# Supplementary material
Source: MDPI journal article supplement (https://www.mdpi.com/2079-6412/8/4/139)
Supplement: s1 [file s1]

# Supplementary Material

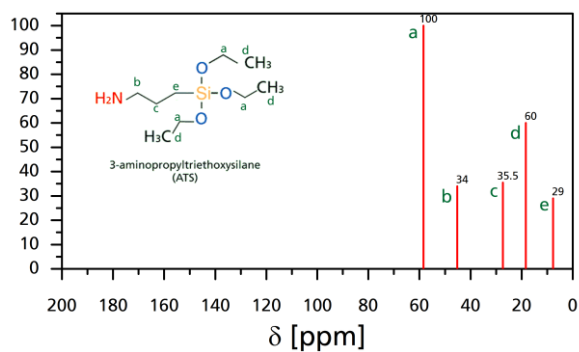

Figure S1. <sup>13</sup>C NMR resonances of ATS.

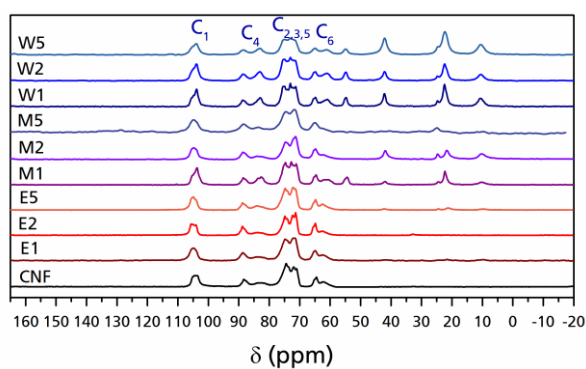

Figure S2. Full <sup>13</sup>C NMR resonances of all the samples.

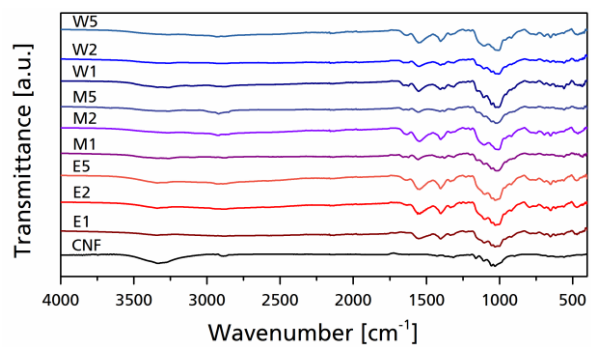

Figure S3. Full infrared spectra of all the samples.

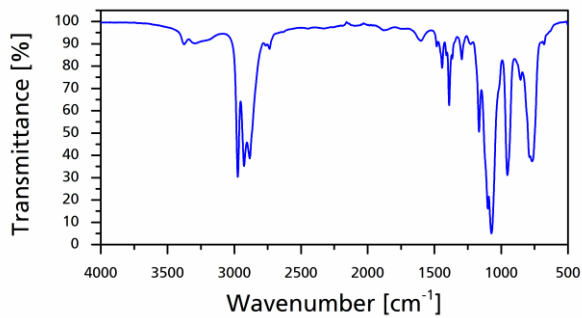

Figure S4. FT-IR spectrum of ATS (normalized).
